# Supplementary material for: Common maternal and fetal genetic variants show expected polygenic effects on risk of small- or large-for-gestational-age (SGA or LGA), except in the smallest 3% of babies
Source: PLoS Genet. 2020 Dec 7;16(12):e1009191. doi: 10.1371/journal.pgen.1009191 (PMC7721187; doi:10.1371/journal.pgen.1009191)
Supplement: S4 Table — A) Associations between fetal and maternal birth weight GS and LGA/SGA. Fetal GS associations include ALSPAC, EFSOCH, NFBC86 and NFBC66. Maternal GS associations include ALSPAC and EFSOCH. Odds ratios represent the increase in risk per decile of birth weight GS. B) Associations between fetal and maternal BW GS and LGA/SGA, adjusted for maternal and fetal BW GS respectively in ALSPAC and EFSOCH mother-child pairs. (XLSX) [file pgen.1009191.s007.xlsx]

## Sheet: S4 Table
	S4A Table: Associations between fetal and maternal birth weight GS and LGA/SGA. Fetal GS associations include ALSPAC, EFSOCH, NFBC86 and NFBC66. Maternal GS associations include ALSPAC and EFSOCH. Odds ratios represent the increase in risk per decile of birth weight GS.
	Genetic Score	Outcome	OR	SE	P	N
	Fetal	LGA	1.32	0.02	7.03e-32	11951
		SGA	0.75	0.03	8.46e-21	11951
	Maternal	LGA	1.17	0.03	3.18e-06	5182
		SGA	0.81	0.04	7.74e-08	5182
	S4B Table: Associations between fetal and maternal BW GS and LGA/SGA, adjusted for maternal and fetal BW GS respectively in ALSPAC and EFSOCH mother-child pairs
	Analysis	Outcome	OR	SE	P	N
	Fetal_adj_Maternal	LGA	1.35	0.04	2.17e-15	5182
		SGA	0.69	0.04	2.77e-16	5182
	Maternal_adj_Fetal	LGA	1.18	0.03	1.3e-06	5182
		SGA	0.8	0.04	2.42e-08	5182
