# Supplementary material for: Common maternal and fetal genetic variants show expected polygenic effects on risk of small- or large-for-gestational-age (SGA or LGA), except in the smallest 3% of babies
Source: PLoS Genet. 2020 Dec 7;16(12):e1009191. doi: 10.1371/journal.pgen.1009191 (PMC7721187; doi:10.1371/journal.pgen.1009191)
Supplement: S5 Table — A) Associations between Fetal and Maternal BW GS and LGA/SGA. The control group consists of babies with birth weight >10th centile and <90th centile. Odds ratios represent the increase in risk per decile of BW GS. B) Associations between Maternal FG and SBP GS, adjusted for fetal genotype, and LGA/SGA. The control group consists of babies with birth weight >10th centile and <90th centile. Odds ratios represent the increase in risk per decile of FG/SBP GS. (XLSX) [file pgen.1009191.s008.xlsx]

## Sheet: S5 Table
	S5A Table: Associations between Fetal and Maternal BW GS and LGA/SGA. The control group consists of babies with birth weight >10th centile and <90th centile. Odds ratios represent the increase in risk per decile of BW GS.
	Genetic Score	Outcome	OR	SE	P
	Fetal	LGA	1.29974	0.0240516	7.79e-28
		SGA	0.777291	0.0306658	1.641e-16
	Maternal	LGA	1.1521	0.0336503	2.798e-05
		SGA	0.821858	0.0393645	6.325e-07
	S5B Table: Associations between Maternal FG and SBP GS, adjusted for fetal genotype, and LGA/SGA. The control group consists of babies with birth weight >10th centile and <90th centile. Odds ratios represent the increase in risk per decile of FG/SBP GS.
	Analysis	Outcome	Score	OR	SE	P
	Maternal	LGA	FG	1.05646	0.0369463	0.136
			SBP	0.942891	0.0427035	0.1698
		SGA	FG	0.969919	0.0421188	0.4681
			SBP	1.14106	0.049004	0.007127
